# Supplementary material for: Evaluation of Vaccine Strains Developed for Efficient, Broad-Range Protection against Foot-and-Mouth Disease Type O
Source: MDPI journal article supplement (doi:10.3390/vaccines11020271), 2023-01-27
Supplement: s1 [file s1]

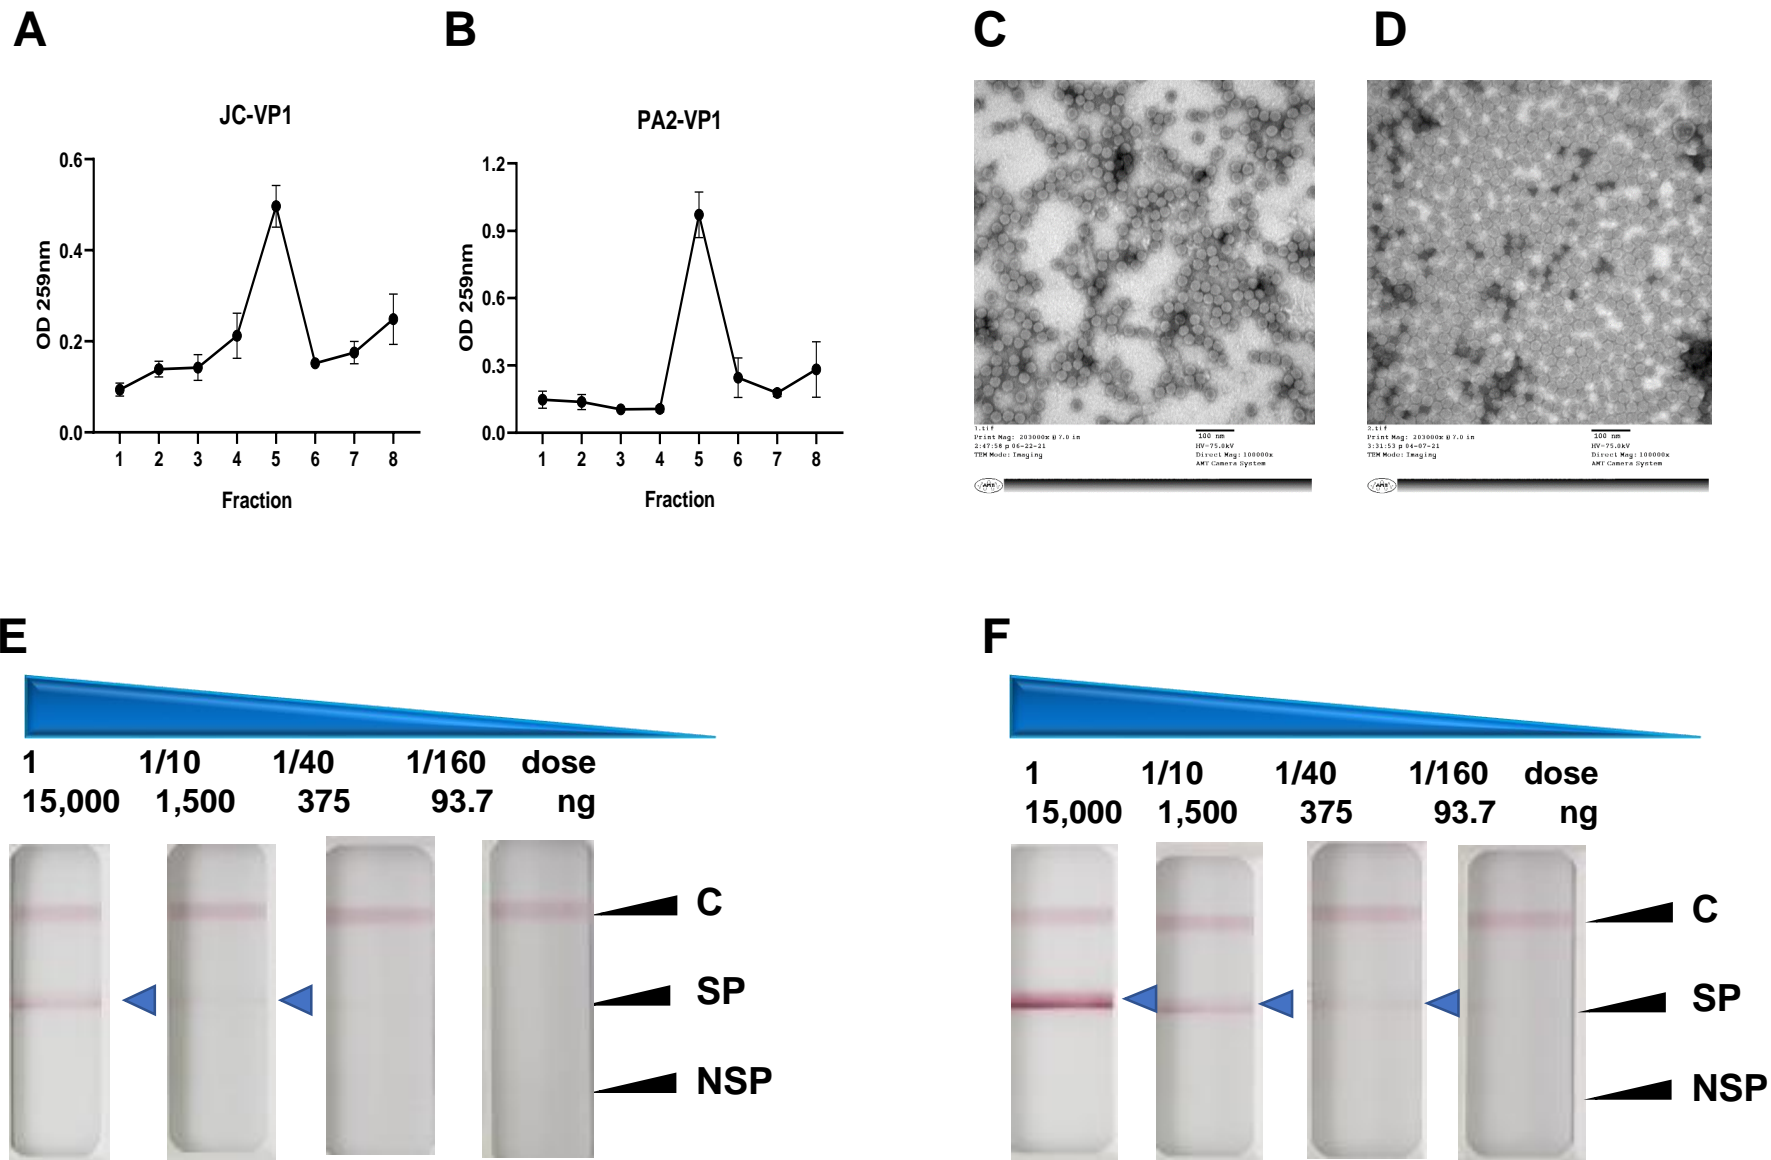

**Figure S1. Verification of Inactivated antigen, JC-VP1 and PA2-VP1.**

(A, B) Spectrophotometer analysis of inactivated antigen, JC-VP1(A) or PA2-VP1(B) in 15%–45% sucrose gradient  
 (C, D) Transmission electron microscopy of inactivated antigens, JC-VP1(C) or PA2-VP1(D). The bar represents 100nm.  
 (E, F) Confirmation of inactivated FMDV antigen, JC-VP1(E) or PA2-VP1(F) dilution using lateral flow assay (PBM co. ltd) kit

**Table S1. Comparison of critical antigenic residues in structural proteins for FMDV type O.**

| Strains   | Site 1 (VP1) |     |     |     | Site 2 (VP2) |     |     |     |     |     |     |     |      |      |      |      | Site 3 (VP1) |      | Site 4 (VP3) |     |     |     |     |     |      |      |      |      | Site 5 (VP1) |     |
|-----------|--------------|-----|-----|-----|--------------|-----|-----|-----|-----|-----|-----|-----|------|------|------|------|--------------|------|--------------|-----|-----|-----|-----|-----|------|------|------|------|--------------|-----|
|           | 144          | 148 | 150 | 208 | 700          | 701 | 702 | 703 | 704 | 705 | 707 | 708 | 1029 | 1031 | 1038 | 1039 | 1090         | 1091 | 403          | 404 | 506 | 508 | 605 | 608 | 1016 | 1031 | 1033 | 1091 | 1095         | 149 |
| O Manisa  | V            | L   | V   | P   | V            | T   | S   | D   | P   | F   | R   | C   | L    | S    | V    | N    | S            | T    | P            | H   | E   | T   | T   | D   | E    | K    | D    | G    | Q            |     |
| O PA2-VP1 | -            | -   | -   | -   | -            | -   | -   | -   | -   | -   | -   | -   | -    | -    | -    | -    | -            | -    | -            | -   | -   | -   | -   | -   | -    | -    | -    | -    | -            |     |
| O JC-VP1  | -            | -   | -   | -   | -            | -   | -   | -   | -   | -   | -   | -   | -    | -    | -    | -    | -            | -    | -            | -   | -   | -   | -   | -   | -    | -    | -    | -    | -            |     |
| O BE      | -            | -   | -   | -   | -            | -   | -   | -   | -   | -   | -   | -   | -    | -    | -    | -    | N            | -    | -            | -   | -   | -   | -   | -   | -    | -    | -    | -    | -            |     |
| O JC      | -            | -   | -   | -   | -            | -   | -   | -   | -   | -   | -   | -   | -    | -    | -    | -    | T            | -    | -            | -   | D   | -   | -   | -   | -    | -    | E    | -    | -            |     |
| O TWN     | -            | -   | -   | -   | -            | -   | -   | -   | -   | -   | -   | -   | -    | -    | -    | -    | -            | K    | -            | -   | D   | -   | -   | -   | -    | -    | -    | -    | -            |     |
| O PA2     | -            | -   | -   | -   | -            | -   | -   | -   | -   | -   | -   | -   | -    | -    | -    | -    | T            | -    | -            | -   | -   | -   | -   | -   | -    | -    | R    | -    | -            |     |

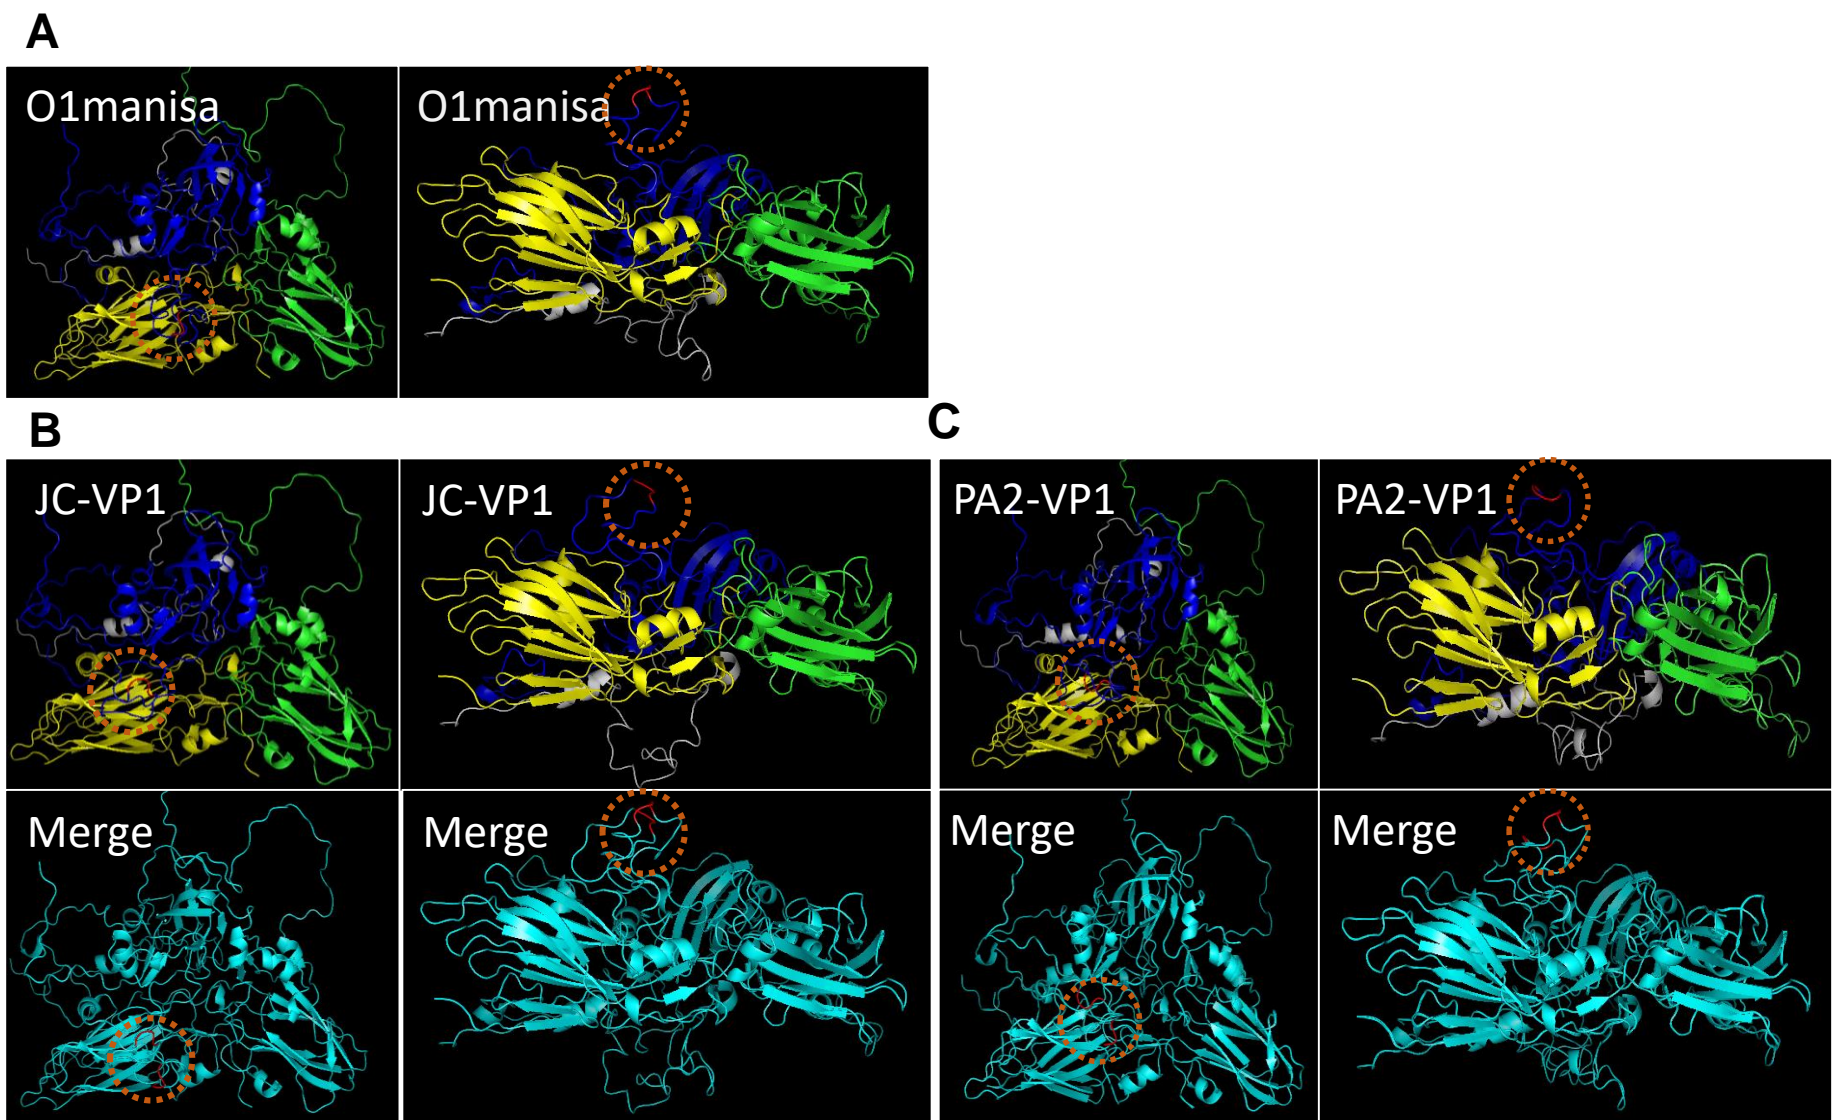

**Figure S2. Schematic diagram of FMDV genomes with VP1 epitope addition for broad spectrum vaccine strains for type O.**

- (A) Surface structure of O1 manisa virus as a control
- (B) Surface structure of JC-VP1
- (C) Surface structure of PA2-VP1

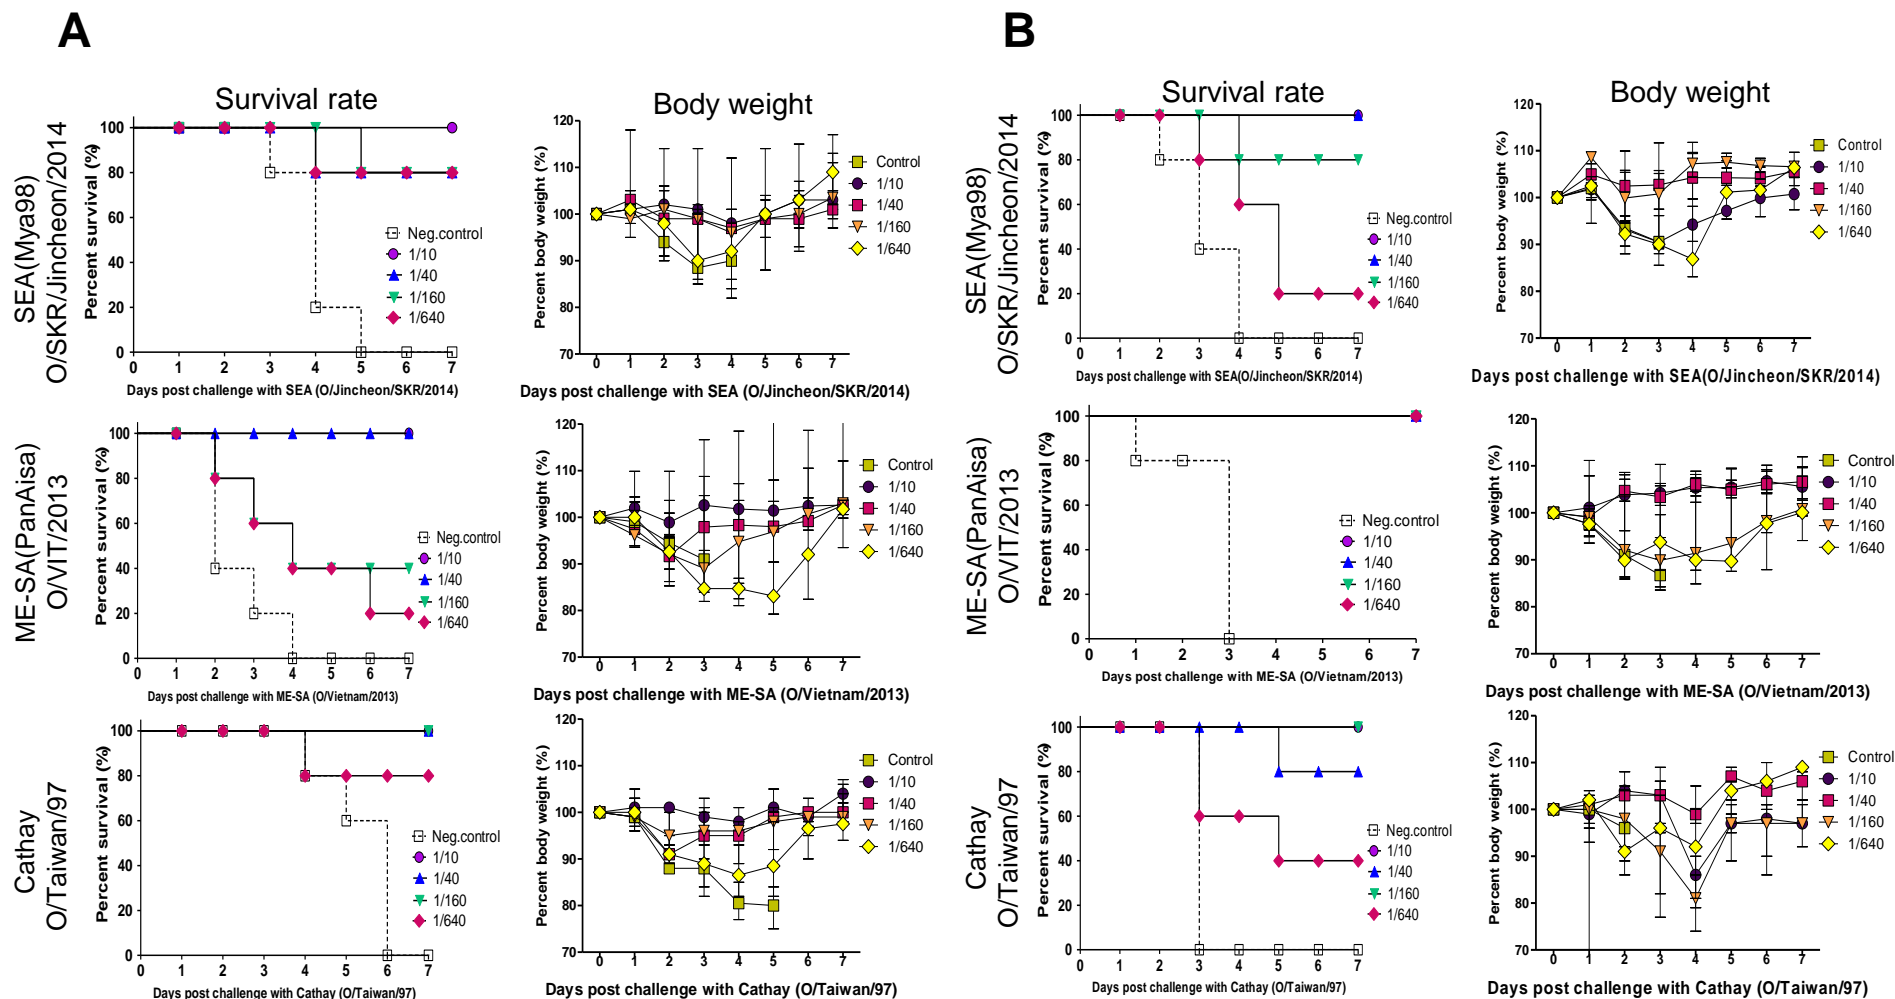

**Figure S3. Protection of the vaccinated mice challenged with typical three topotypes of FMDV.**

C57BL/6 female mice were vaccinated with 1/10(1.5 $\mu$ g), 1/40, 1/160, 1/640 dose of JC-VP1 (A) or PA2-VP1 (B) used for this experiment. The challenged viruses belong to topotype of ME-SA, SEA, and Cathay topotypes.

**A**

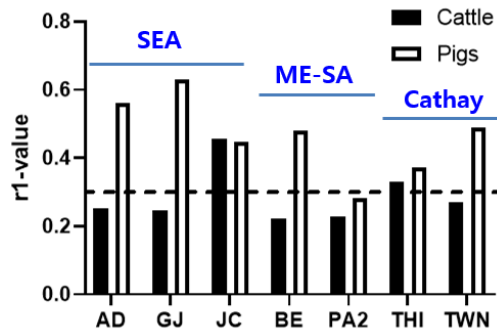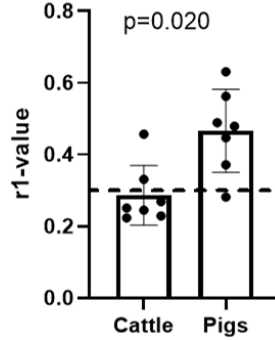

**B**

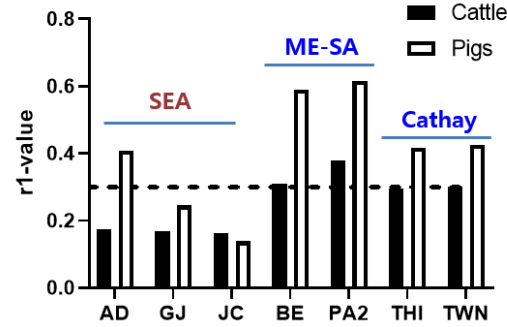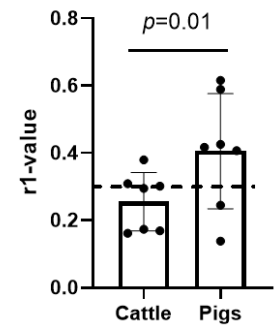

**C**

| Sera from vaccinated animals<br>Topotype, strain |          | Cattle       |              | Pigs         |              |
|--------------------------------------------------|----------|--------------|--------------|--------------|--------------|
|                                                  |          | PA2-VP1      | JC-VP1       | PA2-VP1      | JC-VP1       |
| SEA                                              | AD/2010  | 0.174        | 0.251        | <b>0.407</b> | <b>0.562</b> |
|                                                  | GJ/2016  | 0.169        | 0.245        | 0.245        | <b>0.631</b> |
|                                                  | JC/2014  | 0.162        | <b>0.457</b> | 0.138        | <b>0.447</b> |
| ME-SA                                            | BE/2017  | <b>0.309</b> | 0.224        | <b>0.589</b> | <b>0.479</b> |
|                                                  | PA2/2008 | <b>0.380</b> | 0.229        | <b>0.616</b> | 0.282        |
| Cathay                                           | THI/1960 | 0.295        | <b>0.331</b> | <b>0.417</b> | <b>0.372</b> |
|                                                  | TWN/1997 | <b>0.302</b> | 0.269        | <b>0.426</b> | <b>0.489</b> |

**Figure S4. R1 value of JC-VP1 and PA2-VP1 in cattle and pigs.**

(A) r1 value of JC-VP1 in cattle and pigs

(B) r1 value of PA2-VP1 in cattle and pigs

(C) Comparison of r1 value between JC-VP1 and PA2-VP1.

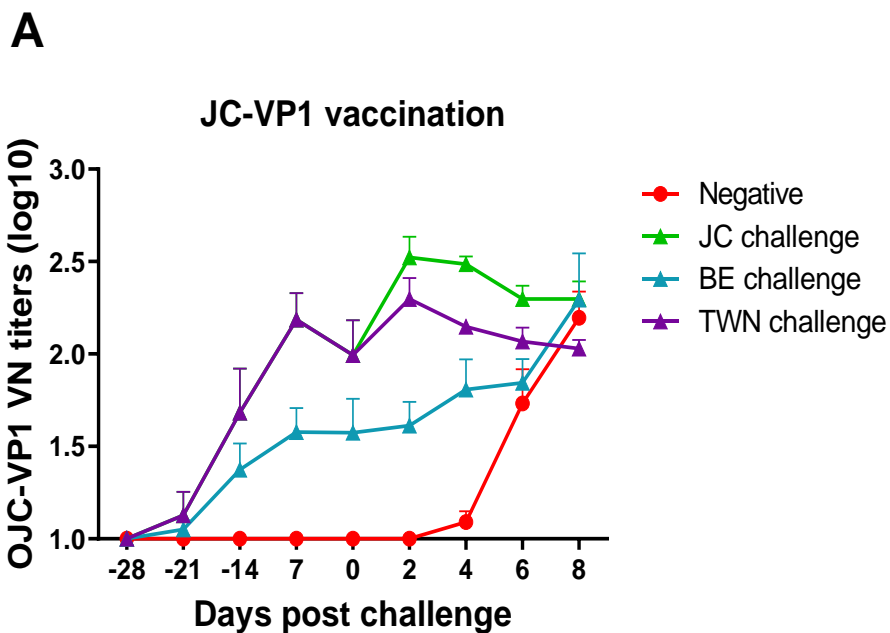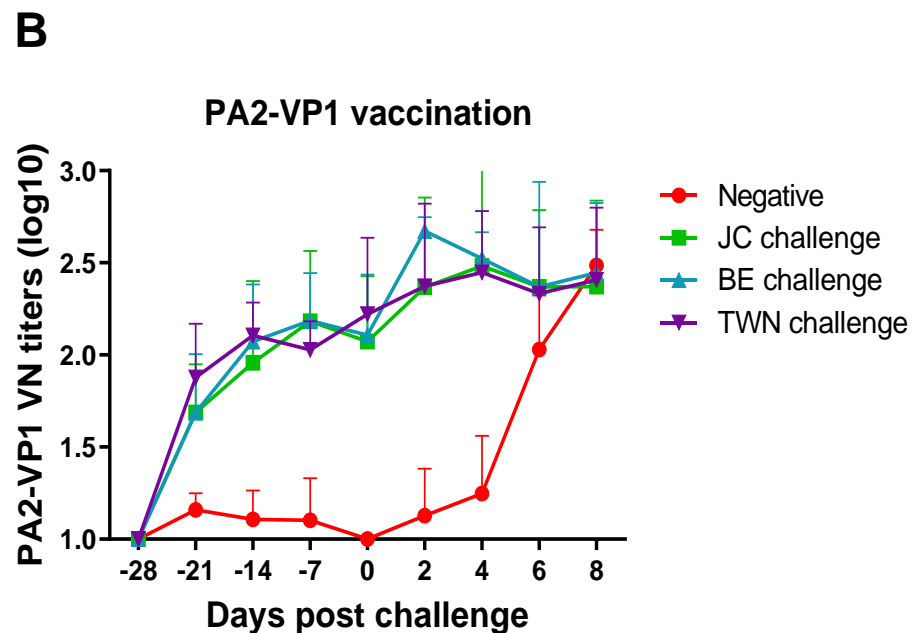

**Figure S5. Variation of virus neutralizing titers against vaccine strain after each three topotype challenge in pigs vaccinated with JC-VP1 and PA2-VP1.**

(A) Virus neutralizing titers against JC-VP1

(B) Virus neutralizing titers against PA2-VP1
